# Supplementary material
Source: MDPI journal article supplement (https://www.mdpi.com/1999-4907/9/10/603)
Supplement: s1 [file s1]

## Supplementary

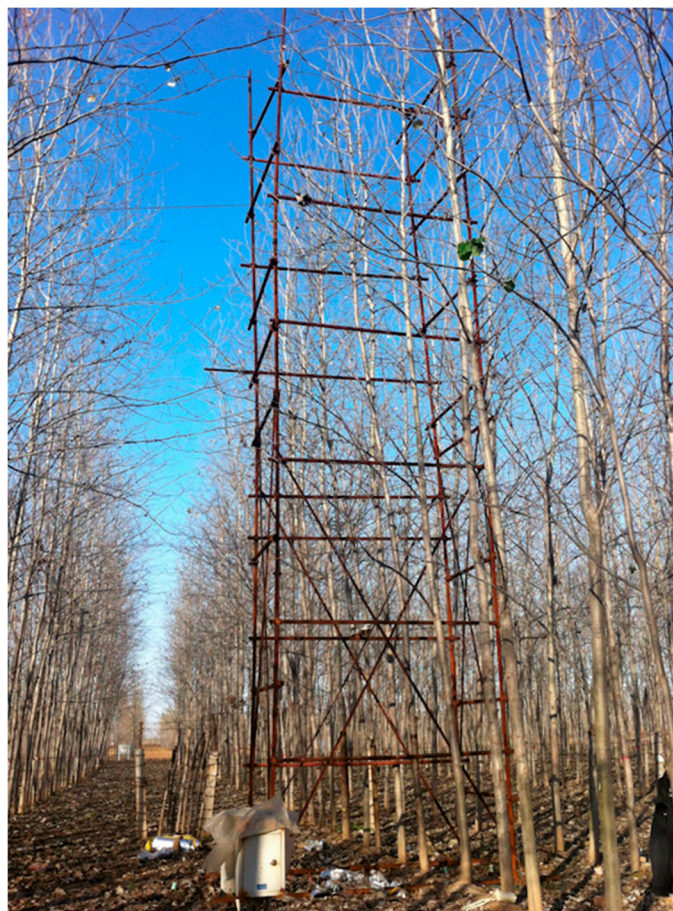

**Figure S1.** The stell scaffold around the sample tree.

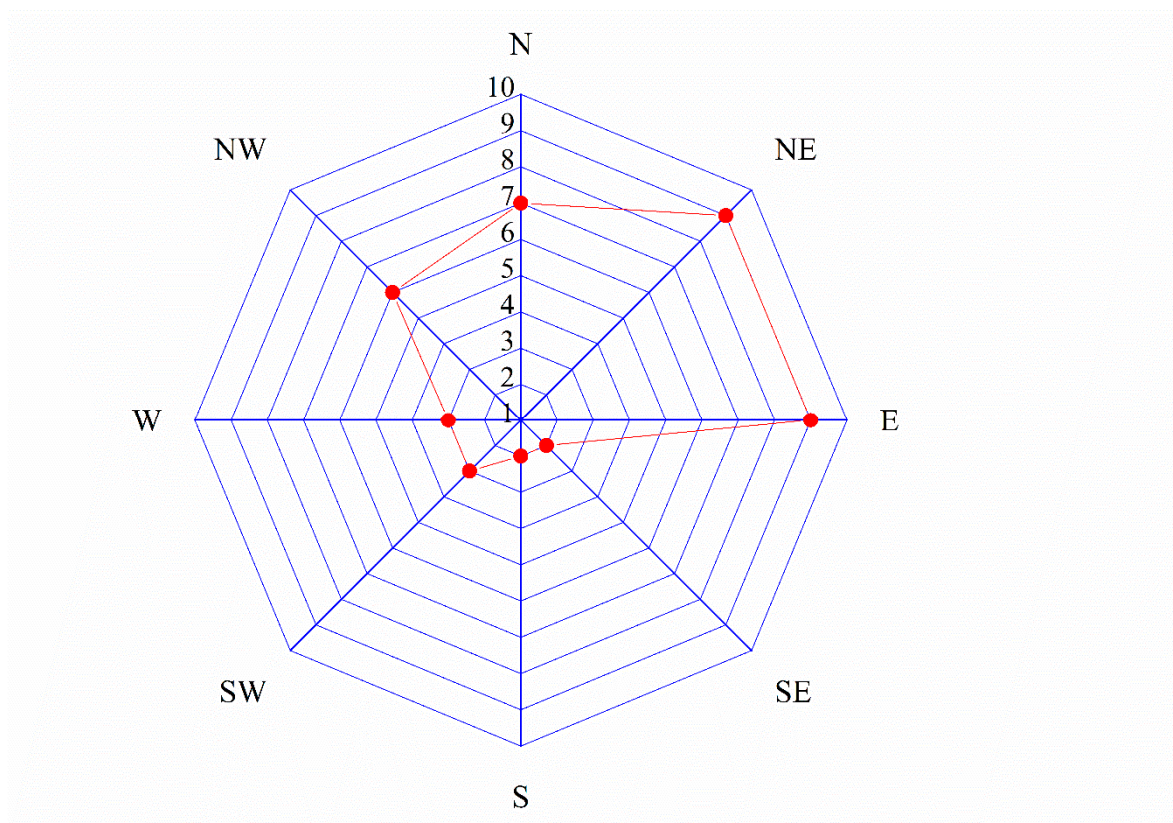

**Figure S2.** First order branch number in different directions.
